# Supplementary material
Source: PubMed Central journal article supplement (PMC3150939)
Supplement: 1109796108_pnas.201109796SI.pdf [file 1109796108_pnas.201109796SI.pdf]

# Supporting Information

Liu et al. 10.1073/pnas.1109796108

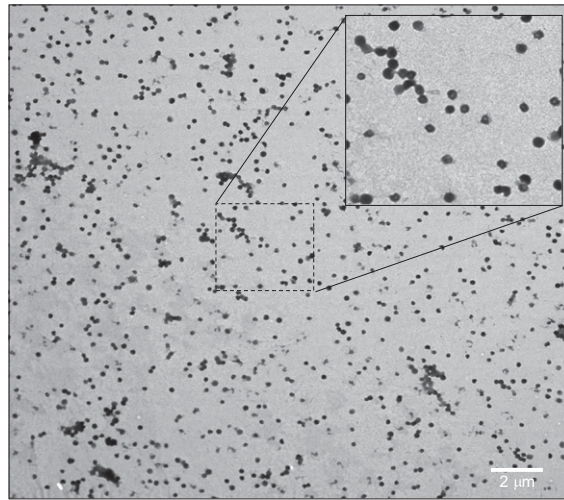

**Fig. S1.** Purified virus is substantially free of cellular debris. Purified virus was negatively stained with 1% uranyl sulfate and observed by electron microscopy. The expanded box is 3  $\mu\text{m}$  in diameter.

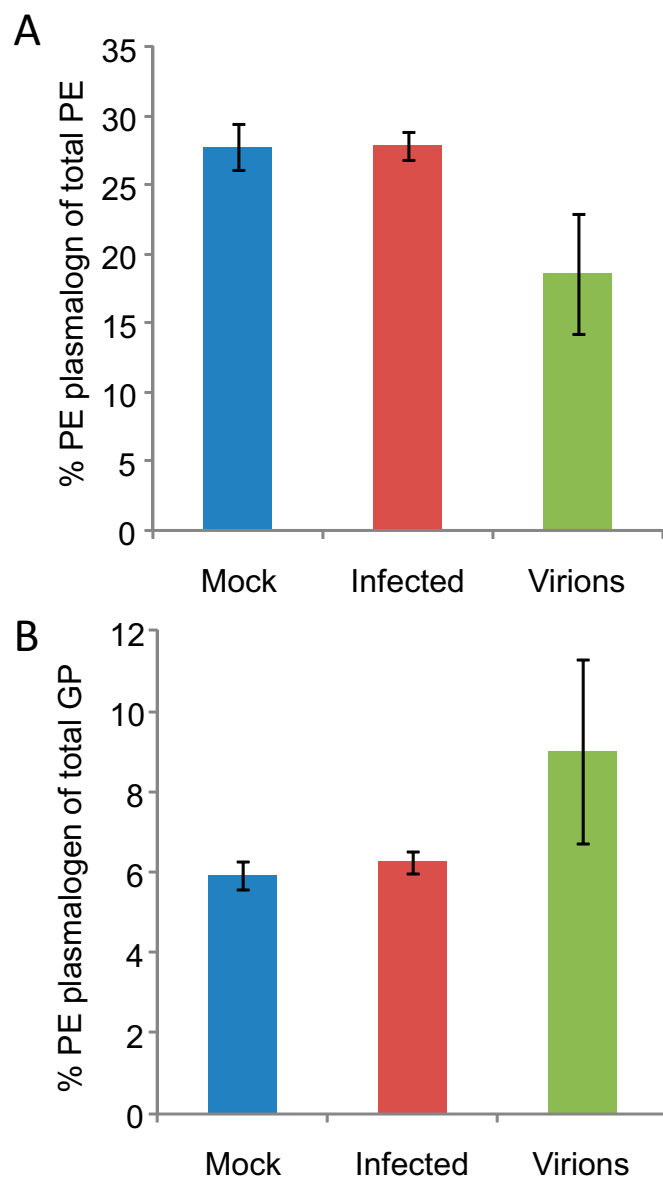

**Fig. S2.** Plasmalogen species in virions. (A) The pool of PE in virions has less representation by plasmalogen species than either mock- or HCMV-infected primary fibroblasts at 96 hpi ( $P = 0.016$  by ANOVA;  $P = 0.033$  for virion vs. uninfected post hoc, and  $P = 0.010$  between virion vs. uninfected post hoc). (B) Virions are enriched for plasmalogen phosphatidylethanolamines (PEs) as a fraction of total glycerophospholipids (GP) compared with mock-infected or human cytomegalovirus-infected primary fibroblasts ( $P = 0.026$  by ANOVA;  $P = 0.043$  for virions vs. uninfected post hoc, and  $P = 0.055$  for virion vs. infected post hoc). Error bars indicate SEM.

#### Dataset S1. Lipidomics data from time courses of mock- and human cytomegalovirus-infected primary fibroblasts

##### [Dataset S1](#)

Means and SEs from three independent experiments are shown.

**Dataset S2. Glycerophospholipid profile of human cytomegalovirus virion**

[Dataset S2](#)

Means and SEs from three independent experiments are shown.
